# Supplementary material
Source: Springer Nature journal article supplement (https://www.springermedizin.de/resource/supplementary/12913_2009_1166_MOESM1_ESM.pdf/9528124)
Supplement: MOESM1 [file 9528124]

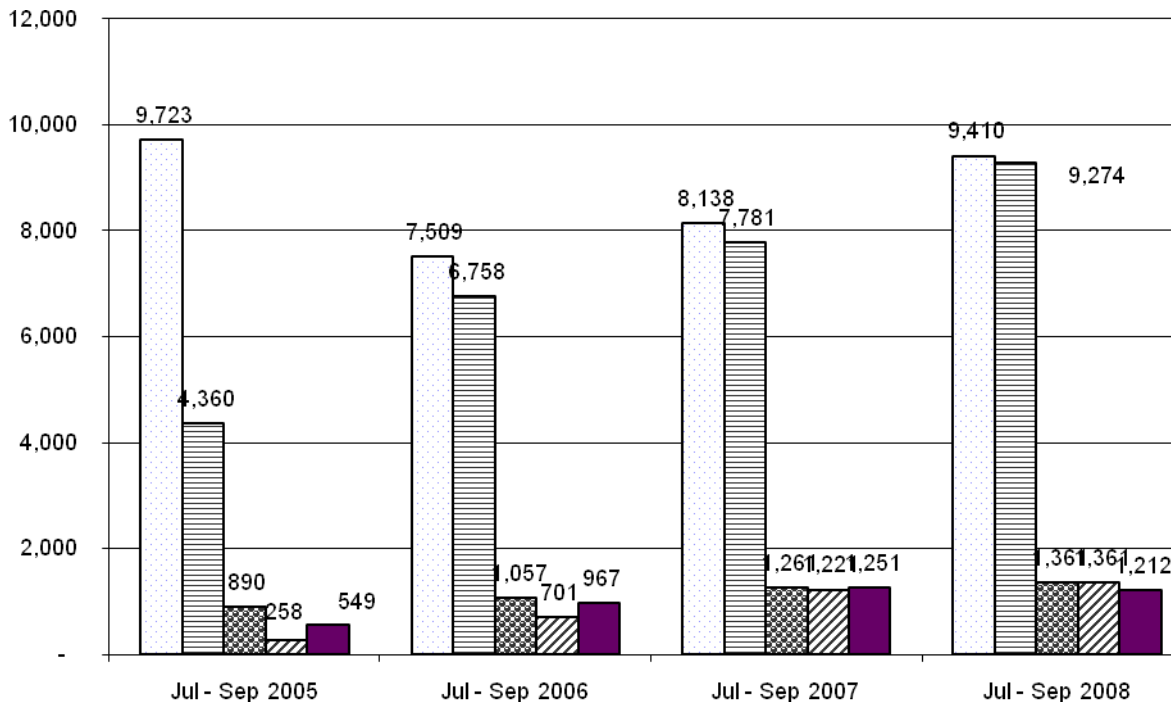

- No. of ALL pregnant women seen this month and counseled about PMTCT
- ▨ No. of women receiving PMTCT services (i.e. counseled, tested and received test results)
- ▩ No. of all pregnant women who agreed to be tested and tested positive for HIV
- ▧ No. of HIV positive women who receive a complete course of ARV prophylaxis to reduce the risk of MTCT
- No. of HIV positive women enrolled or referred for clinical care beyond PMTCT
